# Supplementary material for: Functional responses of a cosmopolitan invader demonstrate intraspecific variability in consumer-resource dynamics
Source: PeerJ journal article supplement (doi:10.7717/peerj.5634), 2018-09-28
Supplement: rawdata.xlsx [file rawdata.xlsx]

## Sheet: FR Experiment Data
id	region	site	prey.species	exp.block	obs	date	start	end	crab.num	start.temp	start.ppt	end.temp	end.ppt	average.temp	average.ppt	cw	crusher	cutter	start.density	end.density	num.killed	partial.dead	damaged.alive	prop.killed	delta.temp	delta.ppt	system
1	BC	BS	trossulus	1	BH	2018-08-05	12:00:00	20:00:00	BS.M.01.1	11.5	31.8	12	31.6	11.75	31.7	63	22.9	16.5	32	19	13	0	0	0.41	-0.5	0.2	flowthrough
2	BC	BS	trossulus	1	BH	2018-08-05	12:00:00	20:00:00	BS.M.01.2	11.4	31.4	12.3	31.3	11.85	31.35	62	23.1	16.9	8	0	8	0	0	1	-0.9	0.1	flowthrough
3	BC	BS	trossulus	1	BH	2018-08-05	12:00:00	20:00:00	BS.M.01.3	11.5	31.3	12	31.3	11.75	31.3	57	15.7	12.2	4	0	4	0	0	1	-0.5	0	flowthrough
4	BC	BS	trossulus	1	BH	2018-08-05	12:00:00	20:00:00	BS.M.01.4	12.2	31.2	12.4	31.3	12.3	31.25	63	25.9	16.7	16	12	4	0	0	0.25	-0.2	-0.1	flowthrough
5	BC	BS	trossulus	1	BH	2018-08-05	12:00:00	20:00:00	BS.M.01.5	12.6	31.1	12.5	31.2	12.55	31.15	58	17.8	14.8	2	0	2	0	0	1	0.1	-0.1	flowthrough
6	BC	BS	trossulus	1	BH	2018-08-05	12:00:00	20:00:00	BS.M.01.6	11.2	31.3	11.8	31.1	11.5	31.2	57	19.8	14.3	64	45	19	11	0	0.3	-0.6	0.2	flowthrough
7	BC	BS	trossulus	2	BH	2018-08-06	12:00:00	20:01:00	BS.M.02.1	11.8	31.9	12.4	31.5	12.1	31.7	63	23.3	16.9	4	0	4	0	0	1	-0.6	0.4	flowthrough
8	BC	BS	trossulus	2	BH	2018-08-06	12:00:00	20:01:00	BS.M.02.2	11.7	31.7	12.3	31.3	12	31.5	62	21.1	16.6	64	23	41	17	0	0.64	-0.6	0.4	flowthrough
9	BC	BS	trossulus	2	BH	2018-08-06	12:00:00	20:01:00	BS.M.02.3	11.6	31.4	15.3	31.3	13.45	31.35	64	20.8	16.8	8	0	8	0	0	1	-3.7	0.1	flowthrough
10	BC	BS	trossulus	2	BH	2018-08-06	12:00:00	20:01:00	BS.M.02.4	11.2	31.4	12.5	31.4	11.85	31.4	55	16.8	13.6	16	3	13	1	0	0.81	-1.3	0	flowthrough
11	BC	BS	trossulus	2	BH	2018-08-06	12:00:00	20:01:00	BS.M.02.5	11.2	31.2	12.6	31.3	11.9	31.25	59	15.6	10.7	32	14	18	1	0	0.56	-1.4	-0.1	flowthrough
12	BC	BS	trossulus	2	BH	2018-08-06	12:00:00	20:01:00	BS.M.02.6	11.3	31.1	12.5	31.2	11.9	31.15	62	20.3	14.6	2	0	2	0	0	1	-1.2	-0.1	flowthrough
13	BC	BS	trossulus	3	BH	2018-08-12	12:00:00	20:00:00	BS.M.03.1	11.7	31.3	12.9	30.9	12.3	31.1	58	16.5	13.4	32	12	20	2	0	0.63	-1.2	0.4	flowthrough
14	BC	BS	trossulus	3	BH	2018-08-12	12:00:00	20:00:00	BS.M.03.2	11.6	31.1	12.8	30.8	12.2	30.95	59	21.6	12.5	4	0	4	0	0	1	-1.2	0.3	flowthrough
15	BC	BS	trossulus	3	BH	2018-08-12	12:00:00	20:00:00	BS.M.03.3	11.6	31.1	12.8	30.8	12.2	30.95	63	20	16.2	64	36	28	10	0	0.44	-1.2	0.3	flowthrough
16	BC	BS	trossulus	3	BH	2018-08-12	12:00:00	20:00:00	BS.M.03.4	11.9	31.1	12.6	30.9	12.25	31	64	25.6	12.4	16	0	16	1	0	1	-0.7	0.2	flowthrough
17	BC	BS	trossulus	3	BH	2018-08-12	12:00:00	20:00:00	BS.M.03.5	11.7	31.1	12.7	30.8	12.2	30.95	58	20.4	13.4	8	0	8	0	0	1	-1	0.3	flowthrough
18	BC	BS	trossulus	3	BH	2018-08-12	12:00:00	20:00:00	BS.M.03.6	11.8	31.1	12.7	30.8	12.25	30.95	62	23.4	16.2	2	0	2	0	0	1	-0.9	0.3	flowthrough
19	BC	QT	trossulus	4	BH	2018-08-24	12:00:00	20:00:00	QT.M.07.1	11.6	31.6	12.5	31.7	12.05	31.65	62	20	15.9	4	1	3	0	0	0.75	-0.9	-0.1	flowthrough
20	BC	QT	trossulus	4	BH	2018-08-24	12:00:00	20:00:00	QT.M.07.2	11.5	31.6	12.5	31.5	12	31.55	64	20	15.9	16	3	13	2	0	0.81	-1	0.1	flowthrough
21	BC	QT	trossulus	4	BH	2018-08-24	12:00:00	20:00:00	QT.M.07.3	11.3	31.3	12.6	31.4	11.95	31.35	61	18.3	12.3	2	0	2	0	0	1	-1.3	-0.1	flowthrough
22	BC	QT	trossulus	4	BH	2018-08-24	12:00:00	20:00:00	QT.M.07.4	11.6	31.3	12.6	31.4	12.1	31.35	57	17.5	13	32	30	2	0	0	0.06	-1	-0.1	flowthrough
23	BC	QT	trossulus	4	BH	2018-08-24	12:00:00	20:00:00	QT.M.07.5	11.7	31.2	12.7	31.3	12.2	31.25	59	17.3	13.3	8	1	7	0	0	0.88	-1	-0.1	flowthrough
24	BC	QT	trossulus	4	BH	2018-08-24	12:00:00	20:00:00	QT.M.07.6	11.7	31.2	12.7	31.3	12.2	31.25	63	20.4	16.4	64	64	0	0	0	0	-1	-0.1	flowthrough
25	BC	QT	trossulus	5	BH	2018-08-25	13:00:00	21:00:00	QT.M.08.1	12	31.6	12.9	31.7	12.45	31.65	56	14.9	13.4	4	0	4	0	0	1	-0.9	-0.1	flowthrough
26	BC	QT	trossulus	5	BH	2018-08-25	13:00:00	21:00:00	QT.M.08.2	11.9	31.3	12.8	31.5	12.35	31.4	65	22.5	16.4	16	0	16	1	0	1	-0.9	-0.2	flowthrough
27	BC	QT	trossulus	5	BH	2018-08-25	13:00:00	21:00:00	QT.M.08.3	11.9	31.3	12.8	31.8	12.35	31.55	62	20.4	15	2	0	2	0	0	1	-0.9	-0.5	flowthrough
28	BC	QT	trossulus	5	BH	2018-08-25	13:00:00	21:00:00	QT.M.08.4	11.8	31.2	12.6	31.4	12.2	31.3	58	16.4	14	64	41	23	9	0	0.36	-0.8	-0.2	flowthrough
29	BC	QT	trossulus	5	BH	2018-08-25	13:00:00	21:00:00	QT.M.08.5	11.9	31.1	12.8	31.4	12.35	31.25	60	15.9	13.4	8	0	8	0	0	1	-0.9	-0.3	flowthrough
30	BC	QT	trossulus	5	BH	2018-08-25	13:00:00	21:00:00	QT.M.08.6	12	31.2	12.8	31.4	12.4	31.3	56	16.4	13.4	32	13	19	8	0	0.59	-0.8	-0.2	flowthrough
31	BC	QT	trossulus	6	BH	2018-08-26	12:00:00	20:00:00	QT.M.09.1	12	31.5	13.3	31.7	12.65	31.6	57	17.4	12.4	8	0	8	1	0	1	-1.3	-0.2	flowthrough
32	BC	QT	trossulus	6	BH	2018-08-26	12:00:00	20:00:00	QT.M.09.2	11.9	31.2	13.2	31.6	12.55	31.4	56	18.3	14.3	32	17	15	6	0	0.47	-1.3	-0.4	flowthrough
33	BC	QT	trossulus	6	BH	2018-08-26	12:00:00	20:00:00	QT.M.09.3	11.7	31.3	12.7	31.4	12.2	31.35	59	17.5	14	2	0	2	0	0	1	-1	-0.1	flowthrough
34	BC	QT	trossulus	6	BH	2018-08-26	12:00:00	20:00:00	QT.M.09.4	11.8	31.2	13	31.3	12.4	31.25	56	17.4	14.4	16	6	10	1	0	0.63	-1.2	-0.1	flowthrough
35	BC	QT	trossulus	6	BH	2018-08-26	12:00:00	20:00:00	QT.M.09.5	12	31.1	13.2	31.2	12.6	31.15	55	15.5	12.7	4	0	4	0	0	1	-1.2	-0.1	flowthrough
36	BC	QT	trossulus	6	BH	2018-08-26	12:00:00	20:00:00	QT.M.09.6	12	31.1	13.2	31.2	12.6	31.15	60	17.4	14	64	41	23	8	0	0.36	-1.2	-0.1	flowthrough
37	NS	BIO	edulis	7	BH	2018-09-26	10:15:00	18:30:00	BIO.M.01.1	10.3	30.7	10.3	31.1	10.3	30.9	60	19.1	16.1	64	46	18	7	2	0.28	0	-0.4	flowthrough
38	NS	BIO	edulis	7	BH	2018-09-26	10:15:00	18:30:00	BIO.M.01.2	10.2	30.6	10.1	31.1	10.15	30.85	58	16.9	14.4	8	4	4	0	1	0.5	0.1	-0.5	flowthrough
39	NS	BIO	edulis	7	BH	2018-09-26	10:15:00	18:30:00	BIO.M.01.3	10.1	30.7	10.5	31.1	10.3	30.9	63	19.6	15.5	4	4	0	0	0	0	-0.4	-0.4	flowthrough
40	NS	BIO	edulis	7	BH	2018-09-26	10:15:00	18:30:00	BIO.M.01.4	10.2	30.7	10.3	31.1	10.25	30.9	64	22.7	17.1	16	2	14	1	0	0.88	-0.1	-0.4	flowthrough
41	NS	BIO	edulis	7	BH	2018-09-26	10:15:00	18:30:00	BIO.M.01.5	10.1	30.8	10.9	30.1	10.5	30.45	57	16.1	13.3	2	0	2	0	0	1	-0.8	0.7	flowthrough
42	NS	BIO	edulis	7	BH	2018-09-26	10:15:00	18:30:00	BIO.M.01.6	10	30.8	10.3	30.2	10.15	30.5	56	17.4	14.4	32	19	13	0	0	0.41	-0.3	0.6	flowthrough
43	NS	BIO	edulis	8	BH	2018-09-28	10:30:00	18:30:00	BIO.M.02.1	10.7	30.4	10.3	31.2	10.5	30.8	60	16.1	11	16	8	8	1	1	0.5	0.4	-0.8	flowthrough
44	NS	BIO	edulis	8	BH	2018-09-28	10:30:00	18:30:00	BIO.M.02.2	10.3	30.7	10.1	31.1	10.2	30.9	57	18.3	12.7	4	0	4	0	0	1	0.2	-0.4	flowthrough
45	NS	BIO	edulis	8	BH	2018-09-28	10:30:00	18:30:00	BIO.M.02.3	10.1	30.9	10.1	31.1	10.1	31	60	19.8	16.1	64	53	11	5	0	0.17	0	-0.2	flowthrough
46	NS	BIO	edulis	8	BH	2018-09-28	10:30:00	18:30:00	BIO.M.02.4	10.4	30.1	10.2	31	10.3	30.55	56	17.6	13.2	32	18	14	3	0	0.44	0.2	-0.9	flowthrough
47	NS	BIO	edulis	8	BH	2018-09-28	10:30:00	18:30:00	BIO.M.02.5	10.4	30.9	10.1	31.1	10.25	31	60	19.9	14.9	2	0	2	0	0	1	0.3	-0.2	flowthrough
48	NS	BIO	edulis	8	BH	2018-09-28	10:30:00	18:30:00	BIO.M.02.6	10.4	30.9	10.3	31.1	10.35	31	62	18.8	16.1	8	4	4	0	0	0.5	0.1	-0.2	flowthrough
49	NS	BIO	edulis	9	BH	2018-09-29	10:30:00	18:30:00	BIO.M.03.1	10.2	31	9.8	31.1	10	31.05	59	16.1	12.2	64	55	9	3	1	0.14	0.4	-0.1	flowthrough
50	NS	BIO	edulis	9	BH	2018-09-29	10:30:00	18:30:00	BIO.M.03.2	10.2	31	9.7	31	9.95	31	58	16.6	14.4	32	28	4	3	0	0.13	0.5	0	flowthrough
51	NS	BIO	edulis	9	BH	2018-09-29	10:30:00	18:30:00	BIO.M.03.3	10	31	9.7	31	9.85	31	55	18.3	12.7	16	8	8	1	0	0.5	0.3	0	flowthrough
52	NS	BIO	edulis	9	BH	2018-09-29	10:30:00	18:30:00	BIO.M.03.4	10.1	31	9.7	31	9.9	31	58	16.6	13.2	4	1	3	2	0	0.75	0.4	0	flowthrough
53	NS	BIO	edulis	9	BH	2018-09-29	10:30:00	18:30:00	BIO.M.03.5	10	31.1	9.7	31	9.85	31.05	57	11	15.8	2	2	0	0	0	0	0.3	0.1	flowthrough
54	NS	BIO	edulis	9	BH	2018-09-29	10:30:00	18:30:00	BIO.M.03.6	10.2	31	9.8	31	10	31	60	18.8	14.4	8	4	4	3	0	0.5	0.4	0	flowthrough
55	NS	KJ	edulis	10	BH	2018-10-03	09:15:00	17:45:00	KJ.M.01.1	9.8	30.3	9.8	30.6	9.8	30.45	62	16.6	14.9	32	21	11	2	0	0.34	0	-0.3	flowthrough
56	NS	KJ	edulis	10	BH	2018-10-03	09:15:00	17:45:00	KJ.M.01.2	9.4	30.7	9.5	30.8	9.45	30.75	63	19.3	16.9	4	0	4	0	0	1	-0.1	-0.1	flowthrough
57	NS	KJ	edulis	10	BH	2018-10-03	09:15:00	17:45:00	KJ.M.01.4	9.4	30.8	9.6	30.9	9.5	30.85	64	19.8	13.8	8	0	8	1	0	1	-0.2	-0.1	flowthrough
58	NS	KJ	edulis	10	BH	2018-10-03	09:15:00	17:45:00	KJ.M.01.5	9.3	30.8	9.5	30.9	9.4	30.85	65	20.5	16.6	64	42	22	8	2	0.34	-0.2	-0.1	flowthrough
59	NS	KJ	edulis	10	BH	2018-10-03	09:15:00	17:45:00	KJ.M.01.6	9.4	30.8	9.6	30.9	9.5	30.85	64	20	16.1	16	5	11	1	0	0.69	-0.2	-0.1	flowthrough
60	NS	KJ	edulis	10	BH	2018-10-03	09:30:00	17:45:00	KJ.M.02.1	9.7	31	9.7	30.9	9.7	30.95	65	16.6	14.9	16	2	14	2	1	0.88	0	0.1	flowthrough
61	NS	KJ	edulis	10	BH	2018-10-03	09:30:00	17:45:00	KJ.M.02.2	9.4	30.9	9.3	30.9	9.35	30.9	60	16.1	14.4	64	43	21	13	3	0.33	0.1	0	flowthrough
62	NS	KJ	edulis	10	BH	2018-10-03	09:30:00	17:45:00	KJ.M.02.3	9.1	30.9	9.1	31	9.1	30.95	62	16.1	14.9	2	0	2	0	0	1	0	-0.1	flowthrough
63	NS	KJ	edulis	10	BH	2018-10-03	09:30:00	17:45:00	KJ.M.02.4	9.5	30.9	9.6	31	9.55	30.95	59	14.9	14.4	8	1	7	1	1	0.88	-0.1	-0.1	flowthrough
64	NS	KJ	edulis	10	BH	2018-10-03	09:30:00	17:45:00	KJ.M.02.5	9.3	30.9	9.5	30.8	9.4	30.85	64	18.8	13.8	32	16	16	7	0	0.5	-0.2	0.1	flowthrough
65	NS	KJ	edulis	10	BH	2018-10-03	09:30:00	17:45:00	KJ.M.02.6	9	31	9.1	30.9	9.05	30.95	60	16.6	14.9	4	0	4	0	0	1	-0.1	0.1	flowthrough
66	NS	KJ	edulis	11	BH	2018-10-04	07:50:00	15:45:00	KJ.M.03.1	10	30.6	9.6	31	9.8	30.8	64	20.5	16.6	32	17	15	5	0	0.47	0.4	-0.4	flowthrough
67	NS	KJ	edulis	11	BH	2018-10-04	07:50:00	15:45:00	KJ.M.03.2	9.7	30.7	9.7	30.9	9.7	30.8	65	18.8	16.6	16	6	10	4	0	0.63	0	-0.2	flowthrough
68	NS	KJ	edulis	11	BH	2018-10-04	07:50:00	15:45:00	KJ.M.03.3	9.7	30.8	9.1	31	9.4	30.9	63	16.6	14	2	0	2	0	0	1	0.6	-0.2	flowthrough
69	NS	KJ	edulis	11	BH	2018-10-04	07:50:00	15:45:00	KJ.M.03.4	9.7	30.9	9.8	30.9	9.75	30.9	61	18.8	16.6	8	0	8	0	0	1	-0.1	0	flowthrough
70	NS	KJ	edulis	11	BH	2018-10-04	07:50:00	15:45:00	KJ.M.03.5	9.7	30.9	9.8	31	9.75	30.95	64	18.8	16.6	4	0	4	0	0	1	-0.1	-0.1	flowthrough
71	NS	KJ	edulis	11	BH	2018-10-04	07:50:00	15:45:00	KJ.M.03.6	9.6	30.9	9.8	30.9	9.7	30.9	60	17.3	14.9	64	52	12	4	0	0.19	-0.2	0	flowthrough
72	NI	CF		1	DO				4	9.7	35.41	9.7	35.33	9.7	35.37	55.02	17.1	11.9	32	18	14	2	0	0.44	0	0.08	closed
73	NI	CF		1	DO				5	10.74	33.97	10.63	33.94	10.685	33.955	60.31	18.32	14.61	4	0	4	0	0	1	0.11	0.03	closed
74	NI	CF		1	DO				7	9.59	34.61	9.6	34.5	9.595	34.555	64.44	19.28	13.59	2	0	2	0	0	1	-0.01	0.11	closed
75	NI	CF		1	DO				9	10.24	34.65	10	34.61	10.12	34.63	55.15	16.4	12.34	8	4	4	0	0	0.5	0.24	0.04	closed
76	NI	CF		1	DO				11	10.87	34.72	10.84	34.71	10.855	34.715	55.8	17.81	10.32	8	4	4	0	0	0.5	0.03	0.01	closed
77	NI	CF		1	DO				12	9.6	34.34	9.65	34.29	9.625	34.315	63.09	20.75	14.51	64	56	8	0	0	0.13	-0.05	0.05	closed
78	NI	CF		1	DO				14	9.55	33.99	9.42	33.97	9.485	33.98	55.97	15.12	11.82	32	21	11	0	0	0.34	0.13	0.02	closed
79	NI	CF		1	DO				15	10.52	34.4	10.33	34.34	10.425	34.37	55.14	12.46	7.78	32	29	3	0	0	0.09	0.19	0.06	closed
80	NI	CF		1	DO				18	10.41	35.47	10.25	35.42	10.33	35.445	56.57	15.76	13.61	64	57	7	0	0	0.11	0.16	0.05	closed
81	NI	CF		1	DO				19	10.61	34.82	10.5	34.82	10.555	34.82	60.11	19.77	14.92	4	4	0	0	0	0	0.11	0	closed
82	NI	CF		1	DO				21	10.34	34.71	10.17	34.7	10.255	34.705	63.81	22.09	13.2	16	3	13	0	0	0.81	0.17	0.01	closed
83	NI	CF		1	DO				27	9.13	34.02	9.2	34	9.165	34.01	57.55	16.73	12.23	2	0	2	0	0	1	-0.07	0.02	closed
84	NI	CF		1	DO				30	9.58	35.3	9.55	35.17	9.565	35.235	62.51	18.97	14.12	64	58	6	0	0	0.09	0.03	0.13	closed
85	NI	CF		1	DO				33	9.26	35.46	9.24	35.39	9.25	35.425	64.32	20.29	16.09	8	8	0	0	0	0	0.02	0.07	closed
86	NI	CF		1	DO				39	10.51	34.4	10.32	34.4	10.415	34.4	62.71	22.49	15.24	2	0	2	0	0	1	0.19	0	closed
87	NI	CF		1	DO				40	10.75	35.11	10.68	35.11	10.715	35.11	58.56	17.72	13.54	16	9	7	0	0	0.44	0.07	0	closed
88	NI	CF		1	DO				45	9.53	34.69	9.38	34.64	9.455	34.665	61.12	20.39	14.91	16	5	11	0	0	0.69	0.15	0.05	closed
89	NI	CF		1	DO				47	10.16	34.6	9.99	34.5	10.075	34.55	59.67	20.78	14.99	4	4	0	0	0	0	0.17	0.1	closed
90	NI	SF		2	DO				1	10.51	34.55	10.42	34.65	10.465	34.6	63.73	21.75	14.82	32	26	6	0	0	0.19	0.09	-0.1	closed
91	NI	SF		2	DO				2	10.51	34.5	10.5	34.5	10.505	34.5	55.75	19.22	10.55	4	4	0	0	0	0	0.01	0	closed
92	NI	SF		2	DO				3	10.53	34.53	10.53	34.53	10.53	34.53	62.74	19.53	15.18	2	2	0	0	0	0	0	0	closed
93	NI	SF		2	DO				4	10.65	34.4	10.65	34.4	10.65	34.4	58.12	14.01	11.59	8	8	0	0	0	0	0	0	closed
94	NI	SF		2	DO				5	10.53	34.6	10.5	34.6	10.515	34.6	60.62	20.74	14.14	8	5	3	0	0	0.38	0.03	0	closed
95	NI	SF		2	DO				6	10.53	34.1	10.6	34.1	10.565	34.1	64.22	24.47	15.81	64	64	0	0	0	0	-0.07	0	closed
96	NI	SF		2	DO				7	9.33	34.27	9.4	34.3	9.365	34.285	65	23.22	17.1	32	32	0	0	0	0	-0.07	-0.03	closed
97	NI	SF		2	DO				8	9.02	34.35	9	34.39	9.01	34.37	60.46	20.22	11.87	32	23	9	0	0	0.28	0.02	-0.04	closed
98	NI	SF		2	DO				9	9.35	34.9	8.99	34.7	9.17	34.8	62.3	23.1	15.12	64	53	11	0	0	0.17	0.36	0.2	closed
99	NI	SF		2	DO				10	9.17	34.28	9.29	35	9.23	34.64	57.32	21.32	12.77	4	1	3	0	0	0.75	-0.12	-0.72	closed
100	NI	SF		2	DO				11	9.28	34.3	9.31	34.25	9.295	34.275	57.39	19.33	12.56	16	5	11	0	0	0.69	-0.03	0.05	closed
101	NI	SF		2	DO				12	9.17	34.3	9.25	34.32	9.21	34.31	61.89	22.78	15.27	2	2	0	0	0	0	-0.08	-0.02	closed
102	NI	SF		2	DO				13	9.36	34.8	9.34	34.4	9.35	34.6	58.89	21.02	13.06	64	59	5	0	0	0.08	0.02	0.4	closed
103	NI	SF		2	DO				14	9.27	34.78	8.96	34.85	9.115	34.815	63.56	24.52	15.22	8	0	8	0	0	1	0.31	-0.07	closed
104	NI	SF		2	DO				15	9.15	34.72	9.1	34.86	9.125	34.79	62.63	23.26	14.03	2	0	2	0	0	1	0.05	-0.14	closed
105	NI	SF		2	DO				16	9.31	34.54	9.15	34.62	9.23	34.58	55.3	17.92	13.51	16	8	8	0	0	0.5	0.16	-0.08	closed
106	NI	SF		2	DO				17	9.3	34.38	9.11	34.64	9.205	34.51	65	24.03	15.99	16	3	13	0	0	0.81	0.19	-0.26	closed
107	NI	SF		2	DO				18	9.38	34.43	9.25	34.74	9.315	34.585	63.16	23.5	15.05	4	0	4	0	0	1	0.13	-0.31	closed
108	NI	BF		3	DO				58	10.7	34.03	10.53	34.04	10.615	34.035	53.57	14.84	11.52	32	21	11	0	0	0.34	0.17	-0.01	closed
109	NI	BF		3	DO				59	9.87	35.19	9.81	33.94	9.84	34.565	61.23	17.84	15.2	4	0	4	0	0	1	0.06	1.25	closed
110	NI	BF		3	DO				60	10.23	35.4	10	35.31	10.115	35.355	58.96	13.49	12.26	2	2	0	0	0	0	0.23	0.09	closed
111	NI	BF		3	DO				61	10.18	34.71	10	34.68	10.09	34.695	64.89	19.52	15.87	8	7	1	0	0	0.13	0.18	0.03	closed
112	NI	BF		3	DO				62	9.94	34.73	9.9	34.81	9.92	34.77	59.5	19.07	14.35	8	7	1	0	0	0.13	0.04	-0.08	closed
113	NI	BF		3	DO				63	10.96	34.42	10.96	34.43	10.96	34.425	61.75	20.77	16.05	64	57	7	0	0	0.11	0	-0.01	closed
114	NI	BF		3	DO				64	9.84	34.07	9.76	34.11	9.8	34.09	59.9	19.11	15.23	32	22	10	0	0	0.31	0.08	-0.04	closed
115	NI	BF		3	DO				65	10.34	35.46	10.16	35.42	10.25	35.44	62.01	23.41	17.56	32	32	0	0	0	0	0.18	0.04	closed
116	NI	BF		3	DO				66	10.6	34.64	10.45	34.53	10.525	34.585	56.69	14.99	13.97	64	61	3	0	0	0.05	0.15	0.11	closed
117	NI	BF		3	DO				67	9.79	34.89	9.72	34.88	9.755	34.885	55.12	17.51	10.66	4	4	0	0	0	0	0.07	0.01	closed
118	NI	BF		3	DO				68	9.35	35.09	9.35	35.11	9.35	35.1	60	18.81	13.99	16	15	1	0	0	0.06	0	-0.02	closed
119	NI	BF		3	DO				69	10.04	34.73	9.97	34.76	10.005	34.745	59.7	19.52	12.73	2	2	0	0	0	0	0.07	-0.03	closed
120	NI	BF		3	DO				70	9.66	35.01	9.66	35.07	9.66	35.04	65	27.13	16.92	64	63	1	0	0	0.02	0	-0.06	closed
121	NI	BF		3	DO				71	10.26	35.48	10.05	35.43	10.155	35.455	65	21.06	15.46	8	8	0	0	0	0	0.21	0.05	closed
122	NI	BF		3	DO				72	9.29	34.37	9.32	34.29	9.305	34.33	65	25.87	15.85	2	0	2	0	0	1	-0.03	0.08	closed
123	NI	BF		3	DO				73	10.13	34.31	9.98	34.26	10.055	34.285	56.04	15.25	12.98	16	16	0	0	0	0	0.15	0.05	closed
124	NI	BF		3	DO				74	9.91	35.29	9.86	35.13	9.885	35.21	52.41	16.53	12.01	16	9	7	0	0	0.44	0.05	0.16	closed
125	NI	BF		3	DO				75	10.27	35.16	10.05	35.11	10.16	35.135	55.41	19.04	12.66	4	2	2	0	0	0.5	0.22	0.05	closed
126	SA	TB		1	MA				1	13	32	13	32	13	32	60	17	12.5	2	1	1	0	0	0.5	0	0	closed
127	SA	TB		1	MA				18	13	31	13	32	13	31.5	61	16.5	12.5	8	0	8	0	0	1	0	-1	closed
128	SA	TB		1	MA				13	12.5	32	12.5	32	12.5	32	64	14.5	11	4	0	4	1	0	1	0	0	closed
129	SA	TB		1	MA				14	13	32	13	32	13	32	61	14.5	12	16	10	6	0	0	0.38	0	0	closed
130	SA	TB		1	MA				5	13	31	13	31	13	31	55	12	10	64	63	1	0	0	0.02	0	0	closed
131	SA	TB		1	MA				16	13.5	32	13.5	32	13.5	32	63	15	12	64	63	1	0	0	0.02	0	0	closed
132	SA	TB		1	MA				9	13	32	13	31	13	31.5	55	13	11	32	31	1	0	0	0.03	0	1	closed
133	SA	TB		1	MA				12	13.5	31	13.5	32	13.5	31.5	58	14	12	4	4	0	0	0	0	0	-1	closed
134	SA	TB		1	MA				17	13	32	13	32	13	32	56	11.5	11	2	2	0	0	0	0	0	0	closed
135	SA	TB		1	MA				2	13	32	13	32	13	32	63	15	12.5	4	0	4	0	0	1	0	0	closed
136	SA	TB		1	MA				3	13	32	13	31	13	31.5	60	15	12.5	32	24	8	0	0	0.25	0	1	closed
137	SA	TB		1	MA				6	13	32	13	32	13	32	57	13	11	32	28	4	0	0	0.13	0	0	closed
138	SA	TB		1	MA				7	13.5	33	13	32	13.25	32.5	64	15.5	11	2	0	2	0	0	1	0.5	1	closed
139	SA	TB		1	MA				8	13	32	13	32	13	32	65	12	10	8	8	0	0	0	0	0	0	closed
140	SA	TB		1	MA				15	13.5	32	13.5	32	13.5	32	57	14	12	16	9	7	0	0	0.44	0	0	closed
141	SA	TB		1	MA				11	13	32	13	33	13	32.5	56	12	11	8	4	4	0	0	0.5	0	-1	closed
142	SA	TB		1	MA				4	13.5	32	13.5	32	13.5	32	56	13	11	16	16	0	0	0	0	0	0	closed
143	SA	TB		1	MA				10	13	31	13	32	13	31.5	60	12	15	64	62	2	0	0	0.03	0	-1	closed
144	SA	TB		3	MA				rr1	13	32	13	32	13	32	57	15.5	13	2	0	2	0	0	1	0	0	closed
145	SA	TB		3	MA				rr2	13.5	32	13	33	13.25	32.5	57	14.5	12	16	7	9	0	0	0.56	0.5	-1	closed
146	SA	TB		3	MA				rr5	13.5	31	13.5	32	13.5	31.5	57	13	11	4	0	4	0	0	1	0	-1	closed
147	SA	TB		3	MA				rr6	13	32	13	31	13	31.5	61	14.5	12	8	1	7	0	0	0.88	0	1	closed
148	SA	HT		2	MA				17	13	33	13	32	13	32.5	65	15.5	13	64	56	8	1	0	0.13	0	1	closed
149	SA	HT		2	MA				5	13	32	13	32	13	32	59	15	13	2	1	1	0	0	0.5	0	0	closed
150	SA	HT		2	MA				18	13	32	13	32	13	32	65	18.5	16	4	2	2	0	0	0.5	0	0	closed
151	SA	HT		2	MA				10	13.5	32	13.5	32	13.5	32	56	14	12	8	4	4	0	0	0.5	0	0	closed
152	SA	HT		2	MA				2	13	31	13	31	13	31	61	14	13	4	0	4	0	0	1	0	0	closed
153	SA	HT		2	MA				12	13	32	13	32	13	32	56	11.5	10.5	64	64	0	0	0	0	0	0	closed
154	SA	HT		2	MA				14	12.5	32	12.5	31	12.5	31.5	63	15	12	32	22	10	1	0	0.31	0	1	closed
155	SA	HT		2	MA				8	13	31	13	32	13	31.5	59	15	12.5	16	6	10	0	0	0.63	0	-1	closed
156	SA	HT		2	MA				11	13	32	13	32	13	32	65	19	9.5	16	5	9	0	0	0.56	0	0	closed
157	SA	HT		2	MA				6	13.5	32	13	32	13.25	32	64	17	14	16	16	0	0	0	0	0.5	0	closed
158	SA	HT		2	MA				15	13	33	13	31	13	32	60	15	12.5	32	20	11	0	0	0.34	0	2	closed
159	SA	HT		2	MA				16	13	32	13	32	13	32	56	13.5	12	32	30	2	0	0	0.06	0	0	closed
160	SA	HT		2	MA				7	13.5	32	13.5	32	13.5	32	56	15	12	2	0	2	0	0	1	0	0	closed
161	SA	HT		2	MA				4	13	32	13	32	13	32	61	15	12.5	2	0	2	0	0	1	0	0	closed
162	SA	HT		2	MA				9	13.5	33	13.5	31	13.5	32	60	14.5	12	64	62	2	0	0	0.03	0	2	closed
163	SA	HT		2	MA				13	13	32	13	32	13	32	65	18	12	8	6	2	0	0	0.25	0	0	closed
164	SA	HT		2	MA				3	13	32	13	32	13	32	58	16	14	4	0	4	0	0	1	0	0	closed
165	SA	HT		2	MA				1	13	31	13	32	13	31.5	59	14	12	8	4	4	0	0	0.5	0	-1	closed
166	SA	HT		3	MA				rr3	13	32	13	32	13	32	63	16.5	13.5	16	15	1	0	0	0.06	0	0	closed
167	SA	HT		3	MA				rr4	13	32	13	32	13	32	58	15	12	64	56	8	0	0	0.13	0	0	closed

## Sheet: metadata (FRs)
id	unique row ID
region	British Columbia, Nova Scotia, South Africa, Northern Ireland
site	one of nine sites within regions
prey.species	Mytilus species ID
exp.block	experimental block
obs	observer
date	date of trial
start	trial start
end	trial end
crab.num	unique crab ID for tracking individuals after trial ended
start.temp	water temperature (degrees C) beginning of trial
start.ppt	salinity (parts per thousand) beginning of trial
end.temp	water temperature (degrees C) end of trial
end.ppt	salinity (parts per thousand)end of trial
average.temp	average of start and end water temps
average.ppt	average of start and end salinities
cw	carapace width (notch to notch) of green crab (mm)
crusher	crusher claw propal height (mm)
cutter	cutter claw propal height (mm)
start.density	number of prey at start of trial
end.density	number of prey at end of trial
num.killed	number of prey killed
partial.dead	number of dead mussels that were only partially consumed
damaged.alive	number of prey alive at end of trial with visible damage to shell (chipping, cracks)
prop.killed	num killed/start density
delta.temp	change in water temperature from start to end
delta.ppt	change in salinity from start to end
system	water supply system

## Sheet: Mussel Morphology Data
prey	region	width	height	length	weight	sa	sti
mussel	BC	9.53	22.17	10.91	0.522	413.341	0.00126
mussel	BC	8.49	22.25	11.29	0.528	422.124	0.00125
mussel	BC	9.25	22.76	12.19	0.509	470.187	0.00108
mussel	BC	8.88	22.88	11.87	0.506	457.377	0.00111
mussel	BC	10.12	22.93	11.03	0.515	434.034	0.00119
mussel	BC	8.81	23.8	12.14	0.545	483.705	0.00113
mussel	BC	9.78	24.08	10.39	0.636	423.961	0.0015
mussel	BC	9.05	24.13	12.01	0.608	485.936	0.00125
mussel	BC	9.24	24.49	13.49	0.676	554.371	0.00122
mussel	BC	9.07	24.73	11.6	0.682	479.719	0.00142
mussel	BC	11.04	24.77	12.26	0.864	521.99	0.00166
mussel	BC	9.35	24.97	12.61	0.655	527.869	0.00124
mussel	BC	9.66	25.16	13.11	0.623	554.719	0.00112
mussel	BC	10.16	25.65	13.45	0.679	582.581	0.00117
mussel	BC	9.4	26.23	12.31	0.61	538.509	0.00113
mussel	BC	11.42	27.54	14.75	1.088	690.415	0.00158
mussel	BC	10.52	27.8	13.19	0.816	615.531	0.00133
mussel	BC	11.58	28.26	15.47	1.147	741.765	0.00155
mussel	BC	11.14	28.68	15.04	0.941	726.508	0.0013
mussel	NS	8.6	22.13	10.55	0.173	393.256	0.00044
mussel	NS	7.04	22.27	11.77	0.214	431.598	0.000496
mussel	NS	7.12	22.35	11.4	0.221	419.828	0.000526
mussel	NS	6.97	22.5	11.58	0.244	428.241	0.00057
mussel	NS	7.57	22.62	11.18	0.198	418.684	0.000473
mussel	NS	8.66	22.73	11.61	0.206	443.367	0.000465
mussel	NS	7.51	22.73	11.26	0.228	423.19	0.000539
mussel	NS	6.41	22.75	11.61	0.209	430.826	0.000485
mussel	NS	8.13	22.9	10.37	0.154	395.632	0.000389
mussel	NS	7.53	23.02	12.25	0.214	465.816	0.000459
mussel	NS	9.51	23.76	11.61	0.279	466.493	0.000598
mussel	NS	7.88	24.02	12.83	0.355	509.208	0.000697
mussel	NS	7.86	25.26	13.08	0.361	543.262	0.000665
mussel	NS	8.76	25.33	13.23	0.382	556.707	0.000686
mussel	NS	8.55	25.34	12.69	0.284	532.82	0.000533
mussel	NS	8.84	25.48	11.71	0.424	495.834	0.000855
mussel	NS	8.39	25.72	13.71	0.389	582.326	0.000668
mussel	NS	8.8	25.89	13.01	0.398	558.534	0.000713
mussel	NS	9.77	26.14	13.97	0.452	612.063	0.000739
mussel	NS	9.06	26.26	12.89	0.492	562.171	0.000875
mussel	NS	8.87	27.07	13.26	0.312	593.031	0.000526
mussel	NS	9.2	27.59	13.75	0.408	627.839	0.00065
mussel	NS	9.88	27.61	13.25	0.384	610.023	0.00063
mussel	NS	8.49	28.94	13.24	0.381	626.922	0.000608
mussel	SA	11.59	26.46	14.84	1.358	673.374	0.00202
mussel	SA	11.65	26.23	14.09	1.607	635.221	0.00253
mussel	SA	9.26	23.61	13.5	0.967	537.799	0.0018
mussel	SA	9.18	24.02	13.95	0.88	563.471	0.00156
mussel	SA	10.2	24.93	13.81	1.086	584.313	0.00186
mussel	SA	9.99	25.32	13.77	1.098	588.755	0.00187
mussel	SA	10.13	25.75	14.06	1.369	611.123	0.00224
mussel	SA	12.03	26.95	14.01	1.37	649.491	0.00211
mussel	SA	12.21	26.95	14.29	1.525	664.128	0.0023
mussel	SA	10.97	26.2	15.19	1.278	677.728	0.00189
mussel	SA	9.85	25.42	14.37	1.148	615.36	0.00187
mussel	SA	9.79	24.66	13.79	1.168	574.722	0.00203
mussel	SA	11.31	24.54	12.63	1.108	536.071	0.00207
mussel	SA	11.79	26.08	14.24	1.362	640.202	0.00213
mussel	SA	11.15	25.22	13.54	1.274	586.477	0.00217
mussel	SA	9.77	27.01	15.14	1.27	683.079	0.00186
mussel	SA	8.72	23.07	12.64	0.825	489.68	0.00169
mussel	SA	10.35	25.12	14.16	1.235	604.299	0.00204
mussel	SA	9.59	24.46	14.69	1.159	606.245	0.00191
mussel	SA	10.59	24.95	14.24	1.058	606.276	0.00175
mussel	SA	10.37	26.13	14.28	1.19	630.591	0.00189
mussel	SA	10.65	25.45	13.26	1.406	574.634	0.00245
mussel	SA	12.16	25.17	14.42	1.501	633.17	0.00237
mussel	SA	11.37	26.78	14.62	1.3	668.139	0.00195
mussel	SA	9.34	23.09	11.62	0.863	454.628	0.0019
mussel	SA	10.5	25.8	13.56	1.2	593.307	0.00202
mussel	SA	10.46	25.12	13.72	1.336	586.428	0.00228
mussel	SA	10.49	27.96	14.73	1.487	690.966	0.00215
mussel	SA	9.91	23.2	13.01	0.956	515.559	0.00185
mussel	SA	10.77	25.87	12.83	1.11	564.742	0.00197
mussel	NI	9.88	15.13	25.45	1.1	722.387	0.00152	1
mussel	NI	11.69	15.11	28.05	1.36	841.744	0.00162	2
mussel	NI	10.52	16.19	27.94	1.51	847.376	0.00178	3
mussel	NI	8.96	12.12	23.39	0.61	553.772	0.0011	4
mussel	NI	11.03	15.78	27.78	1.36	840.127	0.00162	5
mussel	NI	9.78	13.69	24.46	0.93	646.426	0.00144	6
mussel	NI	10.32	14.45	25.24	1.07	704.003	0.00152	7
mussel	NI	10.74	14.3	23.79	0.85	668.311	0.00127	8
mussel	NI	9.96	14.6	25.05	1	695.434	0.00144	9
mussel	NI	10.85	16.66	27.84	1.38	869.441	0.00159	10
mussel	NI	9.22	13.05	23.48	0.68	589.321	0.00115	11
mussel	NI	11.49	15.35	27.09	1.18	815.908	0.00145	12
mussel	NI	9.65	14.01	24.52	0.87	655.226	0.00133	13
mussel	NI	10.76	15.22	27.21	1.25	796.671	0.00157	14
mussel	NI	10.3	14.94	25.93	1.2	739.118	0.00162	15
mussel	NI	9.13	14.33	24.42	0.86	651.768	0.00132	16
mussel	NI	11.05	15.24	25.95	1.26	767.325	0.00164	17
mussel	NI	9.71	13.77	25.67	0.91	679.4	0.00134	18
mussel	NI	9.51	14.08	23.3	0.65	621.854	0.00105	19
mussel	NI	12.07	15.79	27.52	1.37	859.155	0.0016	20
mussel	NI	8.82	12.45	22.62	0.66	542.124	0.00122	21
mussel	NI	10.82	13.89	25.47	0.87	704.421	0.00124	22
mussel	NI	11.18	14.82	27.98	1.35	815.907	0.00166	23
mussel	NI	9.2	13.06	24.05	0.77	603.501	0.00128	24
mussel	NI	8.83	13.7	23.5	0.84	601.658	0.0014	25
mussel	NI	10.73	14.61	26.52	1.07	755.122	0.00142	26
mussel	NI	10.31	14.89	26.87	1.26	764.416	0.00165	27
mussel	NI	10.67	13.66	26.76	1.08	728.598	0.00148	28
mussel	NI	10.35	16.12	25.85	1.29	777.856	0.00166	29
mussel	NI	9.59	14.89	22.94	0.85	638.2	0.00133	30

## Sheet: metadata (morph)
prey	prey type
region	British Columbia, Nova Scotia, South Africa, Northern Ireland
width	width (maximum lateral axis) in mm
height	height (maximum dorsal-ventral axis) in mm
length	shell length (maximum anterior-posterior axis) in mm
weight	shell weight, air-dried and weighed to the nearest 0.01 g
sa	surface area of shell
sti	shell strength index
