# Supplementary material for: Functional responses of a cosmopolitan invader demonstrate intraspecific variability in consumer-resource dynamics
Source: PeerJ journal article supplement (doi:10.7717/peerj.5634), 2018-09-28
Supplement: TableS1.docx [file TableS1.docx]

| Region | Site | Lat/Long | Description | Collection method | Collection date |
| --- | --- | --- | --- | --- | --- |
| BC | Barkley Sound (BS) | 49.033583,  -125.318135 | Shell/cobble beach, intertidal | Baited Fukui fish traps | July 2014 |
| BC | Quatsino Sound (QT) | 50.523696, -128.022879 | Mudflat, intertidal | Baited Fukui fish traps | August 2014 |
| NS | Bedford Basin (BIO) | 44.681659, -63.612537 | City harbour, rocky subtidal | Baited Fukui fish traps | September 2014 |
| NS | Kejimkujik National Park Seaside (KJ) | 43.872674, -64.821507 | Saltmarsh, intertidal | Baited Russel shrimp traps | September 2014 |
| SA | Table Bay (TB) | 33.919692, 18.443147 | City harbour, silty subtidal | Baited crab traps | August 2014 |
| SA | Hout Bay (HT) | 34.049622, 18.348022 | City harbour, silty subtidal | Baited crab traps | August 2014 |
| NI | Strangford Lough (SF) | 54.392125, -5.5740744 | Subtidal, silty | Hand collected | July 2014 |
| NI | Carlingford Lough (CF) | 54.027458, -6.0701758 | Subtidal, sandy | Hand collected | July 2014 |
| NI | Belfast Lough (BF) | 54.679709, -5.6140715 | Subtidal, silty harbour | Hand collected | July 2014 |
