# Supplementary material for: Functional responses of a cosmopolitan invader demonstrate intraspecific variability in consumer-resource dynamics
Source: PeerJ journal article supplement (doi:10.7717/peerj.5634), 2018-09-28
Supplement: TableS2.docx [file TableS2.docx]

|  | Lower 2.5% quantile | Upper 2.5% quantile |
| --- | --- | --- |
| Attack rate (*a*) |  |  |
| **BC v. NI** | 0.78 | 9.39 |
| **NS v. NI** | 0.07 | 2.59 |
| SA v. NI | -0.11 | 5.59 |
|  |  |  |
| Handling time (*h*) |  |  |
| BC v. NS | -0.03 | 0.02 |
| SA v. NI | -0.01 | 0.19 |
| **NS v. NI** | 0.02 | 0.12 |
